# Supplementary material for: Valence and conduction band tuning in halide perovskites for solar cell applications
Source: Royal Society of Chemistry journal article supplement (doi:10.1039/c6ta04949d), 2016-01-01
Supplement: c6ta04949d1.pdf [file c6ta04949d1.pdf]

## Supplemental Materials:

# Valence and conduction band engineering in halide perovskites for solar cell applications

Simone Meloni,<sup>a‡</sup> Giulia Palermo,<sup>a¶</sup> Negar Ashari-Astani,<sup>a‡‡</sup> Michael Grätzel,<sup>b</sup> and Ursula Rothlisberger<sup>\*a</sup>

## 1 Additional computational details

We performed calculations with and without SOC corrections. The effect of SOC corrections to the GGA-PBE band gap ( $E_g$ ) is, typically, of the order of 0.3 – 0.4 and  $\sim 0.7 - 1.3$  eV toward smaller band gaps for Sn and Pb-based perovskites, respectively. SOC corrections do not change the qualitative conclusions of our study: i) both VBM and CBM are important in the tuning of the band gap (Figure S1), ii) the energy of the VBM is mostly affected by the overlap (Figure S2), and iii) that of the CBM mostly by the charge on the B ion (Figure S4). In Reference<sup>1</sup> it is shown that the good agreement between experimental and GGA-PBE computational results for MAPbI<sub>3</sub> is due to a fortuitous cancellation of errors, due to the fact that the underestimation of the band gap in the absence of many-body effects is exactly compensated by the overestimation associated with the lack of SOC corrections.

This compensation is not as efficient in the case of Sn-based perovskites. We also tested the effect of a functional including range-separated exact exchange (HSE<sup>2</sup>). In fact, it might be the exact exchange in the relatively localized VBM and CBM orbitals that lead to the main correction with respect to the GGA results. To test this hypothesis we computed the HSE band gap,  $E_g^{\text{HSE}}$ , of the CsSnI<sub>3</sub> perovskites (in the cubic, tetragonal and orthorhombic phases), added SOC corrections (described below), and compared computational and experimental results (see Figure S3). SOC corrections are computed from the difference of GGA-PBE results with and without SOC:  $\Delta E_g^{\text{SOC}} = E_g^{\text{SOC}} - E_g$ . The so computed band gap of orthorhombic CsSnI<sub>3</sub> (1.05-1.14 eV) is in fair agreement with the recent experimental values of 1.2 eV<sup>3, 4</sup>. For this reason in all the figures of this work CBM energies of all Sn containing systems are rigidly shifted so that  $E_g$  of the orthorhombic CsSnI<sub>3</sub> is 1.14 eV, i.e. our best DFT estimate of the band gap of this system including exact exchange and SOC effects

## 2 Correlation between $q_B$ and $E_{\text{CBM}}$

In Figure S4,  $q_B$  vs  $E_{\text{CBM}}$ .  $q_B = \sum_{i \in B} c_i^2$ , values are reported with  $c_i$  being the projection coefficient of the CBM state onto B atomic orbitals and  $q_B$  as a measure of the amount of CBM charge on B atoms. Figure S4 shows a clear correlation between  $E_{\text{CBM}}$  and  $q_B$ : the higher is the charge on B the lower is  $E_{\text{CBM}}$ . As explained in the main text,  $E_{\text{CBM}}$  grows with the shrinking of  $q_B$  because part of its charge is moved from the attractive  $B^{2+}$  environment to the more repulsive X one. We notice that the trend of  $E_{\text{CBM}}$  with  $q_B$  depends on the halide, with an almost rigid shift toward higher  $E_{\text{CBM}}$  values along the series I → Br → Cl. This is not surprising because along this series the partial negative charge on the halide increases, and so does the electrostatic energy associated to the CBM charge on X. Results with and without SOC present an analogous trend, confirming that the qualitative picture one could gain from pure GGA calculations is correct.

## 3 Correlation between $q_B$ and $O_{\text{TVB}}$

In the main text we explained that bands and band gap tuning strategies can be based on the overlap in the VBM crystal orbital because there is a correlation between this observable, determining the energy of the VBM, and  $q_B$ , determining

\* Corresponding author: École Polytechnique Fédérale de Lausanne, Laboratory of computational chemistry and biochemistry (LCBC), Lausanne, Switzerland, CH-1015. Fax: +123 (0)123 4445557; Tel: +41 21 69 30321, +41 21 69 30325; E-mail: ursula.rothlisberger@epfl.ch

<sup>a</sup> École Polytechnique Fédérale de Lausanne, Laboratory of computational chemistry and biochemistry (LCBC), Lausanne, Switzerland, CH-1015.

<sup>b</sup> École Polytechnique Fédérale de Lausanne, Laboratory of photonics and interfaces (LPI), Lausanne, Switzerland, CH-1015.

† Electronic Supplementary Information (ESI) available: [details of any supplementary information available should be included here]. See DOI: 10.1039/b000000x/

‡ Present address: Sapienza University of Rome, Dept. of Mechanical and Aerospace Engineering, via Eudossiana 18, 00184, Roma, Italy

¶ Present address: Dept. of Chemistry & Biochemistry, Center for Theoretical Biological Physics, Dept. of Pharmacology, Howard Hughes Medical Institute, University of California San Diego, La Jolla, CA 92093-0365, USA.

‡‡ Present address: Sharif university of technology, Dept. of Physics, Tehran, Iran

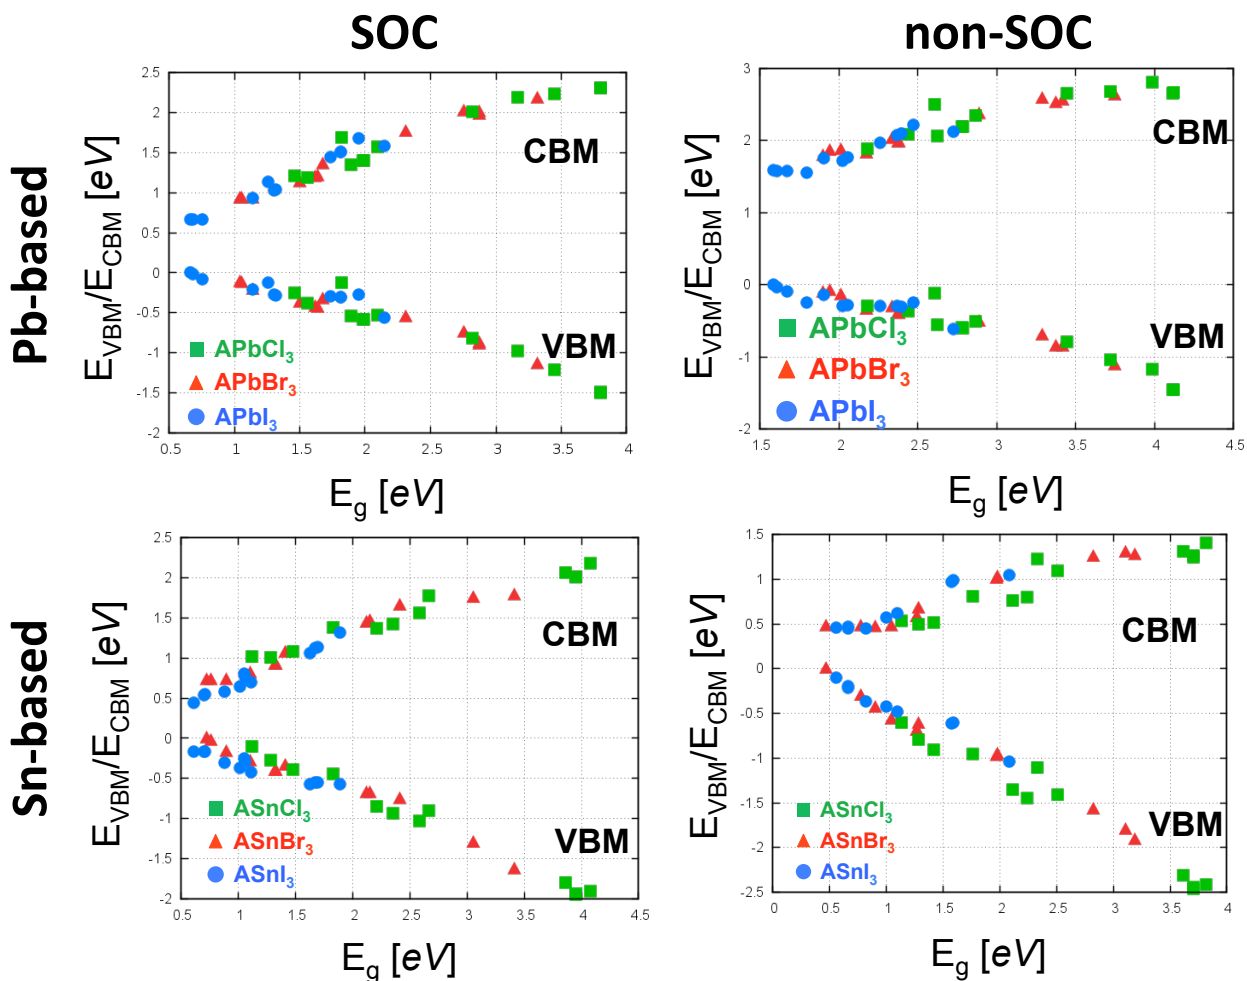

**Fig. S1**  $E_{VBM}$  and  $E_{CBM}$  vs  $E_g$ . The top row refers to Pb-based systems, while the bottom row to Sn-based ones. On the left column we report results obtained including SOC, on the right column results obtained without SOC.

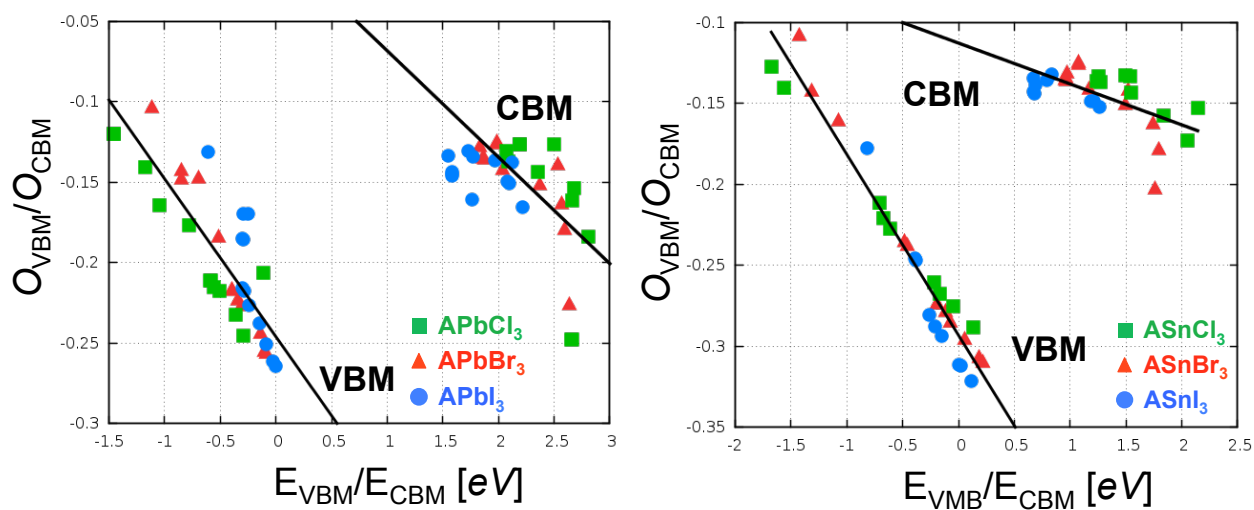

**Fig. S2** (see also Figure ??):  $E_{VBM}$  ( $E_{CBM}$ ) vs  $O_{VBM}$  ( $O_{CBM}$ ) without SOC. For Sn-based systems (right), the relation  $E_{VBM}$  vs  $O_{VBM}$  is linear and its slope is large.  $E_{CBM}$  vs  $O_{CBM}$ , instead, cannot be satisfactorily fit with a linear relation and presents a smaller negative slope. For the Pb-based systems (left), the linear fitting of both  $E_{VBM}$  vs  $O_{CBM}$  and  $E_{CBM}$  vs  $O_{CBM}$  is poor. At variance with the Sn-based perovskites case, here the slope of  $E_{VBM}$  vs  $O_{VBM}$  and  $E_{CBM}$  vs  $O_{CBM}$  fitting is comparable.

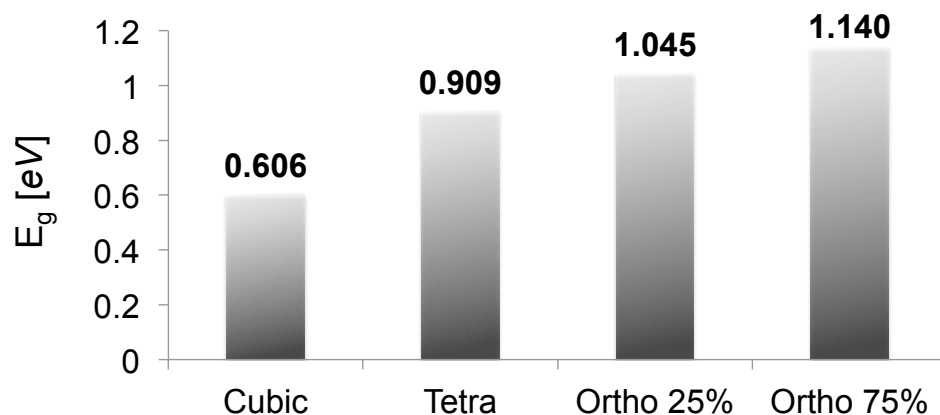

**Fig. S3**  $E_g$  for the various crystal structures of  $\text{CsSnI}_3$ . Ortho 25% and Ortho 75% refer to the two orthorhombic structures identified by Kanatzidis and coworkers<sup>3</sup>. The fitting of crystallographic data required the adoption of a splitting position model for Cs and I atoms, with occupancy 25 and 75% of the two sites of each atomic species. The band gap reported is obtained from DFT calculations using the HSE exchange and correlation functional<sup>2</sup>. The SOC-corrected HSE  $E_g$  (see text above) of the Orthorhombic 75% phase, 1.14 eV, is in nice agreement with the experimental value, 1.3 eV<sup>3, 4</sup>.

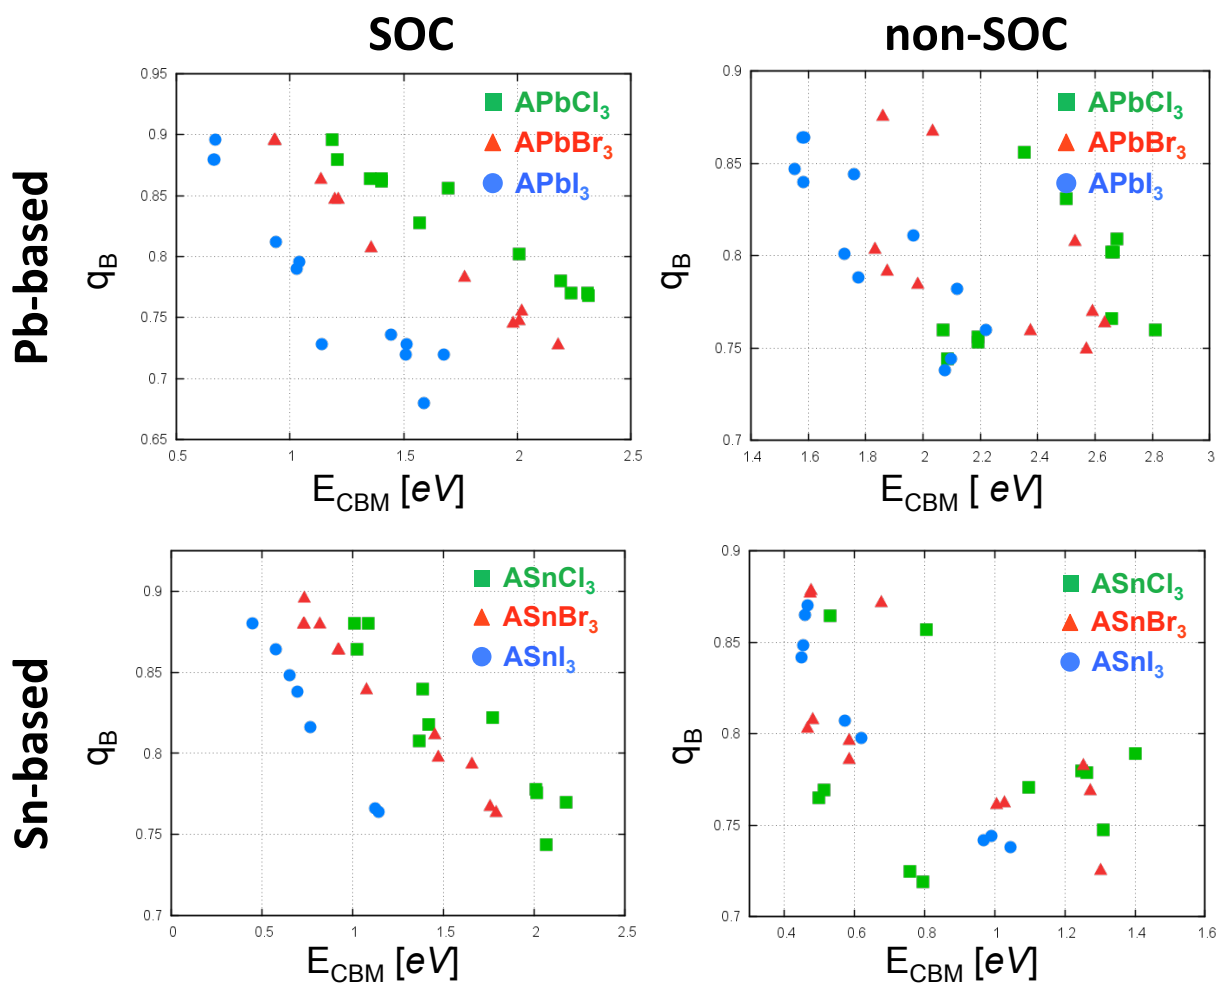

**Fig. S4**  $q_B$  and  $E_{\text{CBM}}$ : The top row refers to Sn-based systems, while the bottom row to Pb-based ones. On the left column we report results obtained including SOC, on the right column results obtained without SOC.

the energy of the CBM. This is shown in Figure S5, where we report  $q_B$  vs  $O_{VBM}$ . We notice that  $q_B$  decreases with  $O_{VBM}$ , which results in a cooperative action in reducing/increasing the gap: when  $O_{VBM}$  changes in the sense of reducing the energy of the VBM,  $q_B$  changes in the direction of increasing the energy of the CBM, and vice versa.

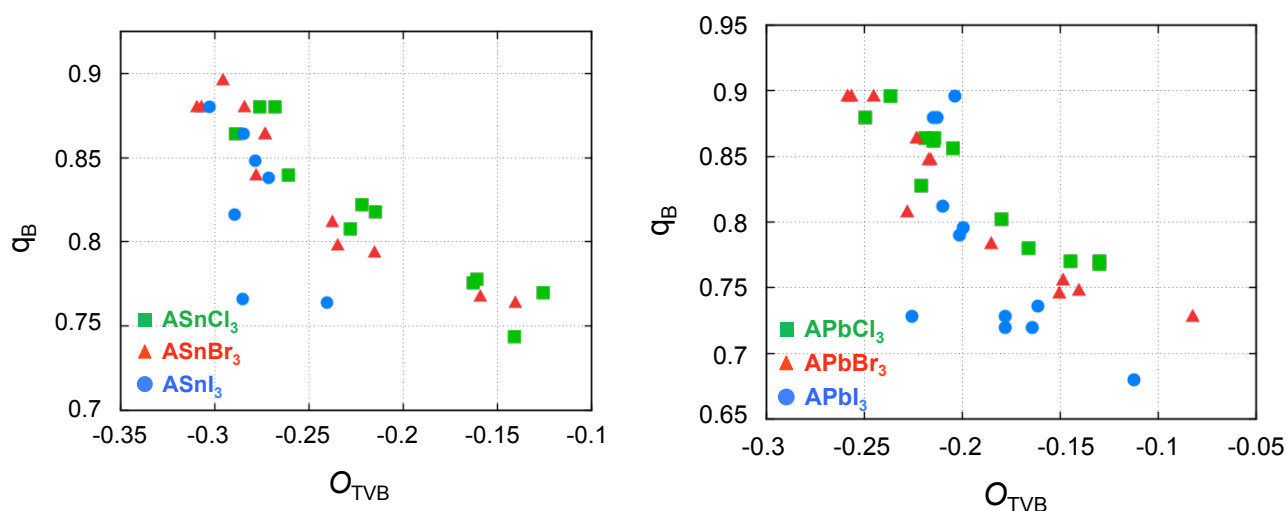

Fig. S5  $q_B$  vs  $O_{VBM}$  for Sn-based (left) and Pb-based (right) perovskites

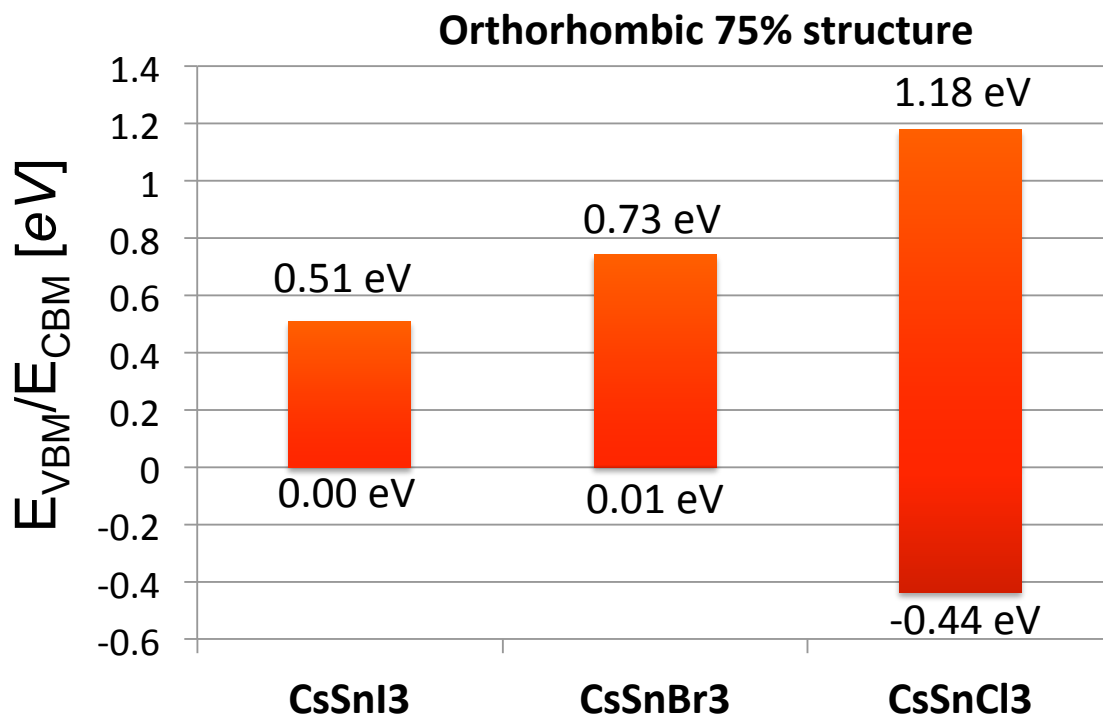

Fig. S6  $E_{VBM}$  and  $E_{CBM}$  energies of the orthorhombic structure of  $CsSnX_3$  perovskites

#### 4 Calculation of the variation of $E_{VBM}$ and $E_{CBM}$ with stoichiometry and crystal symmetry, and the dependence of $E_g$ on them

Figure S1 shows that the energy of VBM and CBM change by  $\sim 2$  and 1.5 eV, respectively, in the systems investigated. Thus, we must conclude that the change of  $E_g$  in the perovskites set is determined by both states. This is only apparently

conflicting with the experimental results of Ref.<sup>5</sup>. In fact, considering the systems investigated in this latter work we also observe that the change in the band gap is mostly determined by the change in the CBM (Figure S6).

## 5 Bands alignment

Here we report the density of state of a series of test systems, orthorhombic CsPbI<sub>3</sub>, LiCsPbI<sub>3</sub>, CsPbBr<sub>3</sub>, and tetragonal CsPbI<sub>3</sub>.

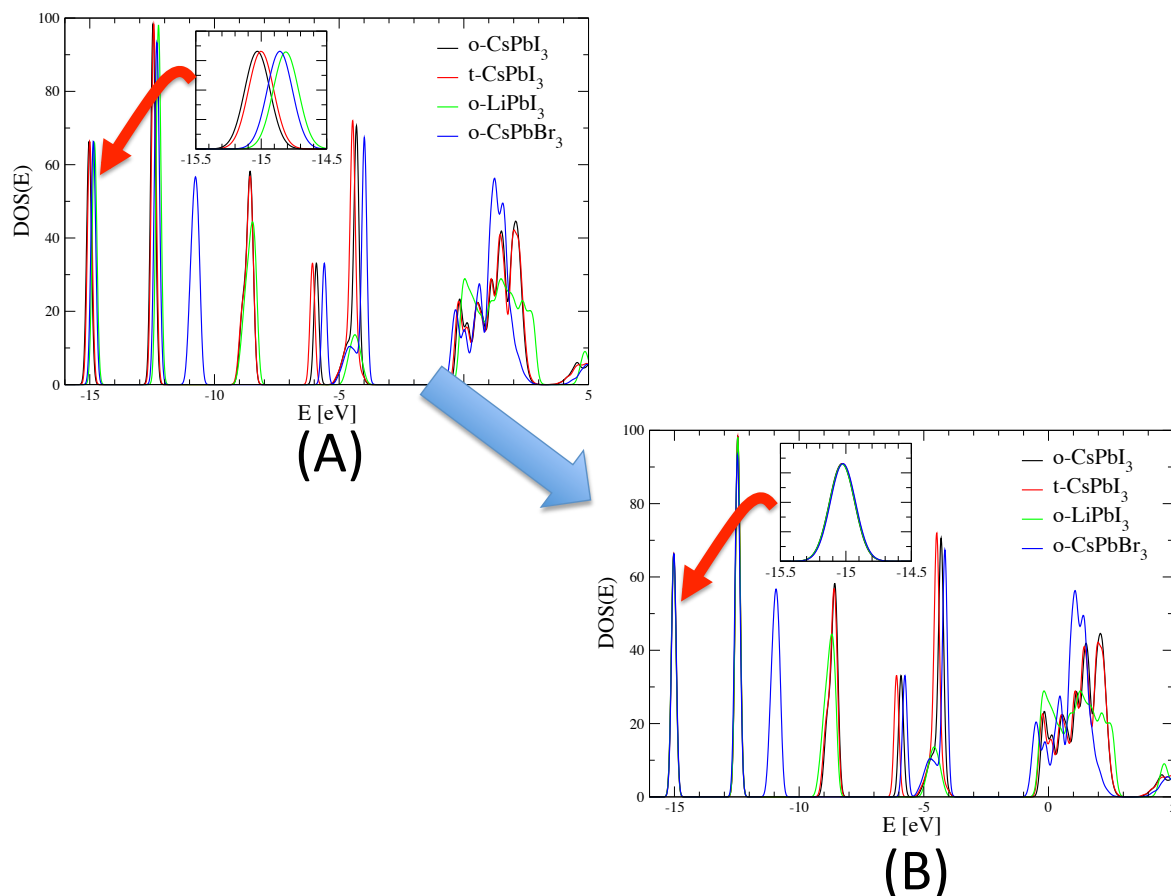

**Fig. S7** Density of states (DOS) of orthorhombic CsPbI<sub>3</sub>, LiCsPbI<sub>3</sub>, CsPbBr<sub>3</sub>, and tetragonal CsPbI<sub>3</sub> before (A) and after (B) applying the line-up procedure described in Sec. ?? . In the inset is reported the part of the DOS relative to atomic Pb-5d orbitals.

## References

- 1 P. Umari, E. Mosconi and F. De Angelis, *Scientific Reports*, 2014, **4**,
- 2 J. Heyd, G. E. Scuseria and M. Ernzerhof, *The Journal of Chemical Physics*, 2006, **124**, 219906.
- 3 I. Chung, J.-H. Song, J. Im, J. Androulakis, C. D. Malliakas, H. Li, A. J. Freeman, J. T. Kenney and M. G. Kanatzidis, *Journal of the American Chemical Society*, 2012, **134**, 8579–8587.
- 4 I. Chung, B. Lee, J. He, R. P. Chang and M. G. Kanatzidis, *Nature*, 2012, **485**, 486–489.
- 5 F. Hao, C. C. Stoumpos, D. H. Cao, R. P. Chang and M. G. Kanatzidis, *Nature Photonics*, 2014, **8**, 489–494.
